# Supplementary material
Source: PubMed Central journal article supplement (PMC6350808)
Supplement: NIHMS1510853-supplement-S2.pdf [file NIHMS1510853-supplement-S2.pdf]

## Online Supplemental Materials 2

Summary table of materials archived for contamination knowledge analysis. Details on each component and how to request samples will be available at <https://curator.jsc.nasa.gov/> prior to OSIRIS-REx sample return.

| Generic    | Major Comp.       | Description                                              | Material Desc.                              | Sample Size                 |
|------------|-------------------|----------------------------------------------------------|---------------------------------------------|-----------------------------|
| OR-MA-0001 | OTES Instrument   | Rotary actuator internal to OTES instrument              | Lubricant; Christo-Lube MCG-117             | ~ 1 g                       |
| OR-MA-0002 | Spacecraft        | Solar array panel structural assy +y                     | Honeycomb Composite                         | 10 cm <sup>2</sup>          |
| OR-MA-0003 | Spacecraft        | Solar array panel structural assy -y                     | Honeycomb Composite                         | 10 cm <sup>2</sup>          |
| OR-MA-0004 | SRC               | Latch claw SRC                                           | Aluminum                                    | 10 cm <sup>2</sup>          |
| OR-MA-0005 | SRC               | Latch claw SRC                                           | Aluminum                                    | 10 cm <sup>2</sup>          |
| OR-MA-0006 | SRC               | Hinge toggle link - SRC                                  | Aluminum                                    | 10 cm <sup>2</sup>          |
| OR-MA-0007 | SRC               | Hinge drive toggle link - SRC                            | Aluminum                                    | 10 cm <sup>2</sup>          |
| OR-MA-0008 | SRC               | Toggle link coupon                                       | Aluminum                                    | 10 cm <sup>2</sup>          |
| OR-MA-0009 | SRC               | Canister control link - SRC                              | Aluminum                                    | 10 cm <sup>2</sup>          |
| OR-MA-0010 | SRC               | Bolt, SRC canister/avionics deck hinge assy              | Stainless Steel                             | ~ 1 inch                    |
| OR-MA-0011 | SRC               | Washer - SRC sample canister hinge assy                  | Stainless steel; CRES A286                  | ~ 1 cm wide                 |
| OR-MA-0012 | SRC               | Washer coupon SRC sample canister hinge assy             | Stainless steel; CRES A286                  | 0.25"                       |
| OR-MA-0013 | SRC               | Braycote 601                                             | Lubricant; Perflourinated Polyether         |                             |
| OR-MA-0014 | SRC               | Braycote 601                                             | Lubricant; Polyether;<br>Perflourinated     |                             |
| OR-MA-0015 | SRC               | SRC filter shell                                         | Aluminum                                    | ~9.5 round x<br>2.5 cm high |
| OR-MA-0016 | SRC               | SRC filter shell                                         | Aluminum                                    | ~9.5 round x<br>2.5 cm high |
| OR-MA-0017 | SRC               | SRC filter unit                                          | Aluminum, filter, epoxy                     | ~9.5 round x<br>2.5 cm high |
| OR-MA-0018 | SRC               | SRC filter unit                                          | Aluminum, filter, epoxy                     | ~9.5 round x<br>2.5 cm high |
| OR-MA-0019 | SRC               | SRC filter unit                                          | Aluminum, filter, epoxy                     | ~9.5 round x<br>2.5 cm high |
| OR-MA-0020 | SRC               | SRC filter unit                                          | Aluminum, filter, epoxy                     | ~9.5 round x<br>2.5 cm high |
| OR-MA-0021 | Support Materials | Swab for possible ArcJet testing at Ames                 | Swab                                        | 2.5 " long                  |
| OR-MA-0022 | OCAMS             | Colorless First Contact                                  | Polymer; cleaning solution                  | 31 mm pellet<br>cup         |
| OR-MA-0023 | OCAMS             | Dow Corning DC 93-500                                    | Epoxy - elastomer adhesive                  | 31 mm pellet<br>cup         |
| OR-MA-0024 | OCAMS             | Nusil SCV1-2599                                          | Epoxy - silicone adhesive                   | 31 mm pellet<br>cup (half)  |
| OR-MA-0025 | OCAMS             | Braycote 602EF                                           | Lubricant - braycote 602EF                  | 3 ml syringe                |
| OR-MA-0026 | OCAMS             | Nyebar                                                   | Lubricant - Nyebar fluorocarbon<br>"epoxy"  | 60 ml bottle                |
| OR-MA-0027 | OCAMS             | AEROGLAZE Z307                                           | Paint; black paint                          | nine 2" x 2"<br>squares     |
| OR-MA-0028 | OCAMS             | Witness plates                                           | glass witness plates                        | 4" dia. metal<br>can        |
| OR-MA-0029 | OCAMS             | Epoxy used on witnesses                                  | Epoxy - Scotchweld 2216B/A                  | in Aluminum<br>pan          |
| OR-MA-0030 | OCAMS             | Alion white paint                                        | Paint; Z93C55 thermal control<br>coating    | nine 2" x 2"<br>squares     |
| OR-MA-0031 | SRC               | braided shielding coupon; sample canister hinge assembly | Stainless steel; 316L; LM-<br>DB10911B-0025 | ~ 10 inch                   |

|                   |                   |                                                                   |                                          |                                |
|-------------------|-------------------|-------------------------------------------------------------------|------------------------------------------|--------------------------------|
| <b>OR-MA-0032</b> | TAGSAM            | outer pogo tube coupon; sampler arm pogo subassembly              | Aluminum 6061-T6                         | ~ 2 cm long section            |
| <b>OR-MA-0033</b> | TAGSAM            | wrist motor fitting assembly coupon; wrist drive assembly         | Aluminum 6061-T652                       | 10 cm <sup>2</sup>             |
| <b>OR-MA-0034</b> | SRC               | EMI gasket; sample canister hinge assembly                        | beryllium copper                         | ~ 6" long, 0.25" diam.         |
| <b>OR-MA-0035</b> | TAGSAM            | driven shaft coupon; wrist drive assembly                         | Stainless steel; A386-CRES               | ~ 3.5 cm long                  |
| <b>OR-MA-0036</b> | SRC               | avionics deck connector bracket coupon                            | Aluminum                                 | 10 cm <sup>2</sup>             |
| <b>OR-MA-0037</b> | TAGSAM            | driven gear key (-022); wrist drive assembly                      | Stainless steel; A386-CRES               | ~ 3.125 cm long                |
| <b>OR-MA-0038</b> | TAGSAM            | washer coupon; wrist drive CRES                                   | Stainless steel; CRES-NAS620C4           | No.4, 0.032" thick             |
| <b>OR-MA-0039</b> | TAGSAM            | set screw coupon; wrist drive assembly                            | Steel-AN565FC428H8                       | ~ 1 cm long                    |
| <b>OR-MA-0040</b> | SRC               | tray assembly (-107); capture ring assembly                       | Aluminum alloy; 7050-T7451               | 10 cm <sup>2</sup>             |
| <b>OR-MA-0041</b> | SRC               | tang bracket assembly (-104); tang assembly                       | Aluminum                                 | 10 cm <sup>2</sup>             |
| <b>OR-MA-0042</b> | SRC               | spring mandrel (-109); deployable witness plate assembly SRC      | Aluminum                                 | 10 cm <sup>2</sup>             |
| <b>OR-MA-0043</b> | SRC               | LH spring (-111); deployable witness plate assembly SRC           | Stainless steel                          | ~ 1" long                      |
| <b>OR-MA-0044</b> | TAGSAM            | wrist end fitting assembly (-504); wrist drive assembly           | Aluminum 6061-T651                       | 10 cm <sup>2</sup>             |
| <b>OR-MA-0045</b> | SRC               | retainer clip deployed (-107); sample canister top assembly       | Stainless steel                          | 10 cm <sup>2</sup>             |
| <b>OR-MA-0046</b> | TAGSAM            | washer coupon; wrist drive assembly                               | Stainless steel; CRES - NAS620C4         | 0.209" OD, 0.032" thick        |
| <b>OR-MA-0047</b> | TAGSAM            | screw coupon; wrist drive assembly                                | Stainless steel; A286-CRES, NAS1352N04-8 | ~1.5 cm long                   |
| <b>OR-MA-0048</b> | TAGSAM            | washer coupon; wrist drive assembly                               | Stainless steel; 300 CRES - NAS620CAL    | ~0.5 cm wide                   |
| <b>OR-MA-0049</b> | TAGSAM            | nut coupon; wrist drive assembly                                  | Stainless steel; CRES                    | ~ 1 cm top diameter            |
| <b>OR-MA-0050</b> | SRC               | locking nut coupon; SRC hinge assembly                            | Stainless steel; CRES, MS21043-3         | 0.1900" od                     |
| <b>OR-MA-0051</b> | TAGSAM            | screw coupon; wrist assembly; CRES-NAS1352N04-4                   | Stainless steel; CRES-NAS1352N04-4       | 0.8 cm long                    |
| <b>OR-MA-0052</b> | SRC               | SRC washer coupon; SRC hinge assembly                             | Stainless steel; A286 CRES NAS1149E0363R | 0.438" OD                      |
| <b>OR-MA-0053</b> | TAGSAM            | driven shaft spacer coupon (-014); wrist drive assembly           | Stainless steel; A386-CRES               | ~ 2.5 cm long, ~ 1 cm diameter |
| <b>OR-MA-0054</b> | TAGSAM            | wrist end fitting key coupon (-021); wrist drive assembly         | Stainless steel; A386-CRES               | ~ 8 cm long                    |
| <b>OR-MA-0055</b> | TAGSAM            | detent pin coupon (-006); wrist drive assembly                    | Stainless steel; A386-CRES               | ~ 2 cm long                    |
| <b>OR-MA-0056</b> | Support Materials | AcrJet test piece S-01                                            | PICA                                     | flakes                         |
| <b>OR-MA-0057</b> | Support Materials | ArcJet test piece S-02                                            | PICA                                     | flakes                         |
| <b>OR-MA-0058</b> | Support Materials | ArcJet test piece S-03                                            | PICA                                     | flakes                         |
| <b>OR-MA-0059</b> | SRC               | Washer coupon, SRC top assembly                                   | Stainless steel; 300 CRES - NAS620C8L    | ~0.5 cm OD                     |
| <b>OR-MA-0060</b> | SRC               | SRC canister coupon (-502), sample canister hinge assembly        | Aluminum alloy; 7075-T7351               | ~13 cm x 3.5 cm                |
| <b>OR-MA-0061</b> | TAGSAM            | Driven Gear coupon (-006), wrist drive assembly                   | Stainless steel; 17-4 PH CRES            | ~ 4 cm diameter                |
| <b>OR-MA-0062</b> | TAGSAM            | Microswitch bracket coupon (-105), capture ring assembly          | Aluminum                                 | 10 cm <sup>2</sup>             |
| <b>OR-MA-0063</b> | TAGSAM            | RH Torsion Spring, capture ring assembly                          | Stainless steel                          | ~ 2" long                      |
| <b>OR-MA-0064</b> | SRC               | Pin Coupon (-103), deployable witness plate assembly SRC          | Stainless steel                          | ~ 12 cm long                   |
| <b>OR-MA-0065</b> | SRC               | Witness Plate Bracket Coupon (-106), sample canister top assembly | Aluminum                                 | 10 cm <sup>2</sup>             |
| <b>OR-MA-0066</b> | SRC               | RH Spring coupon (-112), Deployable Witness Plate Assembly SRC    | Stainless steel                          | ~ 1" long                      |

|                   |                   |                                                                            |                                                      |                      |
|-------------------|-------------------|----------------------------------------------------------------------------|------------------------------------------------------|----------------------|
| <b>OR-MA-0067</b> | TAGSAM            | SARA Panel Structure Coupon                                                | Honeycomb Composite                                  | 5 cm x 5 cm x 3.5 cm |
| <b>OR-MA-0068</b> | SRC               | Cap Screw, SRC Top Assembly                                                | Stainless steel; CRES, NAS1352N08-8                  | ~1.5 cm long         |
| <b>OR-MA-0069</b> | TAGSAM            | Hard Stop Coupon (-104), Capture Ring Assembly                             | Stainless steel; A286                                | ~12 cm long          |
| <b>OR-MA-0070</b> | SRC               | Screw coupon, SRC Top Assembly                                             | Stainless steel; CRES                                | ~ 1 cm long          |
| <b>OR-MA-0071</b> | TAGSAM            | Cam Coupon (-102), Capture Ring Assembly                                   | Stainless steel                                      | 10 cm <sup>2</sup>   |
| <b>OR-MA-0076</b> | SRC               | SARA/SRC TVAC residue from foil witness plates - Control Witness           | NVR; residue                                         | in 3" aluminum dish  |
| <b>OR-MA-0077</b> | SRC               | SARA/SRC TVAC residue from foil witness plates - Front TQCM Witness        | NVR; residue                                         | in 3" aluminum dish  |
| <b>OR-MA-0078</b> | SRC               | SARA/SRC TVAC residue from foil witness plates - Back of Chamber Witness   | NVR; residue                                         | in 3" aluminum dish  |
| <b>OR-MA-0079</b> | SRC               | SARA/SRC TVAC residue from foil witness plates - Below SRC Witness         | NVR; residue                                         | in 3" aluminum dish  |
| <b>OR-MA-0080</b> | SRC               | SARA/SRC TVAC residue from foil witness plates - Side TQCM Witness         | NVR; residue                                         | in 3" aluminum dish  |
| <b>OR-MA-0081</b> | SRC               | SARA/SRC TVAC residue from foil witness plates - Scavenger Plate Witness   | NVR; residue                                         | in 3" aluminum dish  |
| <b>OR-MA-0082</b> | SRC               | heater, SRC avionics deck (opposite of canister side)                      | Acrylic adhesive tape                                | ~8 " plus cable      |
| <b>OR-MA-0083</b> | SRC               | Avionics Deck Connector bracket coupon (-101) Sample canister top assembly | Aluminum 7050-T7451                                  | 10 cm <sup>2</sup>   |
| <b>OR-MA-0084</b> | Spacecraft        | 3M 471 tape, spacecraft structure                                          | Vinyl; blue vinyl; rubber adhesive                   | 1.5" x 1"            |
| <b>OR-MA-0085</b> | SRC               | SRC shim coupon (-108)                                                     | Aluminum foil                                        | 3 cm x 2 cm          |
| <b>OR-MA-0086</b> | TAGSAM            | TAGSAM sapphire witness plate, launch coupon (-111)                        | Sapphire                                             | 1" diameter          |
| <b>OR-MA-0087</b> | TAGSAM            | frangibolt catch can coupon (-007) TAGSAM top assembly                     | Aluminum 6061-T651                                   | 10 cm <sup>2</sup>   |
| <b>OR-MA-0088</b> | TAGSAM            | gear cover coupon (-011), wrist drive assembly                             | Aluminum 6061-T651                                   | 10 cm <sup>2</sup>   |
| <b>OR-MA-0089</b> | TAGSAM            | nut coupon, capture ring assembly                                          | Stainless steel; A286 CRES, NAS509-4C                | ~ 1 cm diameter      |
| <b>OR-MA-0090</b> | TAGSAM            | cam pin coupon (-103), capture ring assembly                               | Stainless steel; A286 CRES                           | ~ 10 cm long         |
| <b>OR-MA-0091</b> | SRC               | washer coupon, sample canister top assembly                                | Stainless steel; CRES steel, NAS620C10L              | 0.354" OD            |
| <b>OR-MA-0092</b> | SRC               | roll pin coupon, deployable witness plate assembly                         | Stainless steel; CRES; MS16562-201                   | ~ 1 cm long          |
| <b>OR-MA-0093</b> | SRC               | Stow guide bracket assembly right (-102), sample canister top assembly     | Aluminum; 7050-T7451                                 | 10 cm <sup>2</sup>   |
| <b>OR-MA-0094</b> | TAGSAM            | Self-locking nut coupon, capture ring assembly                             | Stainless steel; CRES, NAS1291C02M                   | 0.2 cm               |
| <b>OR-MA-0095</b> | SRC               | SRC wire mesh screen coupon (-107)                                         | Stainless steel                                      | 3 cm x 2 cm          |
| <b>OR-MA-0096</b> | SRC               | Tang coupon (-105), Tang assembly                                          | Titanium 6AL-4V                                      | 10 cm <sup>2</sup>   |
| <b>OR-MA-0097</b> | TAGSAM            | TAGSAM sapphire coupon (-115)                                              | Sapphire                                             | 1 " diameter         |
| <b>OR-MA-0098</b> | SRC               | witness plate cap screws coupon, SRC top assembly                          | Stainless Steel; heat-resistant steel, NAS1352N08-10 | ~ 2 cm long          |
| <b>OR-MA-0099</b> | SRC               | cap screw coupons, capture ring assembly                                   | Stainless Steel; CRES NAS1352N02-10                  | ~2 cm long           |
| <b>OR-MA-0100</b> | SRC               | cap screw coupons                                                          | Stainless Steel; CRES NAS1352N02-10                  | ~ 2 cm long          |
| <b>OR-MA-0101</b> | SRC               | SRC screw, capture ring assembly                                           | Stainless Steel; A286 CRES                           | ~0.4" length         |
| <b>OR-MA-0102</b> | Support Materials | brass fastener from GCKP stand                                             | Brass                                                | ~ 1.5"               |
| <b>OR-MA-0103</b> | Support Materials | Si wafer blanks                                                            | Silicon wafer                                        | ~ 1 cm x 1 cm        |
| <b>OR-MA-0104</b> | Support Materials | Si wafer blanks from cleaning                                              | Silicon wafer                                        | ~ 1 cm x 1 cm        |
| <b>OR-MA-0105</b> | Support Materials | Si wafers                                                                  | Silicon wafer                                        | ~ 1 cm x 1 cm        |
| <b>OR-MA-0106</b> | Support Materials | tape lift from TAGSAM Qual head                                            | Tape Lift from TAGSAM Qual head                      |                      |

|                   |                   |                                              |                                                |                    |
|-------------------|-------------------|----------------------------------------------|------------------------------------------------|--------------------|
| <b>OR-MA-0107</b> | TAGSAM            | Flight TAGSAM Head TVAC residue              | NVR; chamber pre-cert - blank                  | 2" round Al pan    |
| <b>OR-MA-0108</b> | TAGSAM            | Flight TAGSAM Head TVAC residue              | NVR; chamber pre-cert                          | 2" round Al pan    |
| <b>OR-MA-0109</b> | TAGSAM            | Flight TAGSAM Head TVAC residue              | NVR; TAGSAM bakeout - blank                    | 2" round Al pan    |
| <b>OR-MA-0110</b> | TAGSAM            | Flight TAGSAM Head TVAC residue              | NVR; TAGSAM bakeout                            | 2" round Al pan    |
| <b>OR-MA-0111</b> | TAGSAM            | Washer coupon                                | Stainless steel; CRES NAS620C8L                | 5/16" diam         |
| <b>OR-MA-0112</b> | SRC               | sapphire coupon, pre-open                    | Sapphire                                       | 1.2" x 0.8"        |
| <b>OR-MA-0113</b> | Support Materials | polyester lacing tape                        | Polyester                                      | ~ 4" long          |
| <b>OR-MA-0114</b> | Support Materials | Ultratape 1110 (Orange glove tape)           | Polyethylene; tape, acrylic adhesive           | 1.5 x 3 "          |
| <b>OR-MA-0115</b> | TAGSAM            | TAGSAM rivit, POGO arm assembly              | Stainless Steel; A286 CRES                     | 0.388"             |
| <b>OR-MA-0116</b> | Launch Container  | launch container base coupon                 | Aluminum 6061-T651; A286 stainless steel       | 10 cm <sup>2</sup> |
| <b>OR-MA-0117</b> | SRC               | Washer, capture ring assembly                | Stainless Steel; CRES; NAS1149EN232R           | 0.25" diam.        |
| <b>OR-MA-0118</b> | SRC               | SRC avionics deck connector bracket          | Aluminum 7050-T7451                            | 10 cm <sup>2</sup> |
| <b>OR-MA-0119</b> | SRC               | SRC aluminum witness plate coupon post-open  | Aluminum                                       | 1.2" x 0.8 "       |
| <b>OR-MA-0120</b> | Support Materials | Kimtech nitrile glove NxT                    | nitrile butadiene rubber                       | ~ 8" long          |
| <b>OR-MA-0121</b> | Support Materials | TX1009 AlphaWipe                             | Polyester 100%                                 | 9" x 9"            |
| <b>OR-MA-0122</b> | Support Materials | shipping container dessicant DESI-PAK        | tyvek packet; bentonite clay                   | 8" x 5" bag        |
| <b>OR-MA-0123</b> | REXIS             | TiNi switch washer                           | Ti Al-4V, 302SS, Ag/Cu wire, Tetzal            | 2 7/8" x 5/8"      |
| <b>OR-MA-0124</b> | REXIS             | Frangibolt Ti bolt                           | Titanium 6Al-4V                                | 1.33" x 0.183"     |
| <b>OR-MA-0125</b> | REXIS             | Frangibolt Housing Iridite                   | Iridite [Henkel Alodine 1132 Touch-n-prep pen] | 4 1/8" x 7/8"      |
| <b>OR-MA-0126</b> | REXIS             | Torlon standoff                              | Polymer - Torlon 5030                          | 1.058" x 0.394"    |
| <b>OR-MA-0127</b> | OLA               | Solithane 113                                | Epoxy - urethane pre-polymer                   | 1/2 of 3" pan      |
| <b>OR-MA-0128</b> | OLA               | CV-2646                                      | Polymer - electrically conductive RTV silicone | 1/2 of 3" pan      |
| <b>OR-MA-0129</b> | OLA               | CV-2646                                      | Polymer - electrically conductive RTV silicone | 1/2 of 3" pan      |
| <b>OR-MA-0130</b> | OLA               | CV-2646                                      | Polymer - electrically conductive RTV silicone | 1/2 of 3" pan      |
| <b>OR-MA-0131</b> | OLA               | Hysol EA 934NA                               | Epoxy adhesive                                 | 1/2 of 3" pan      |
| <b>OR-MA-0132</b> | OLA               | Hysol EA 934NA                               | Epoxy adhesive                                 | 1/2 of 3" pan      |
| <b>OR-MA-0133</b> | OLA               | Solithane 113                                | Epoxy - urethane pre-polymer                   | 1/2 of 3" pan      |
| <b>OR-MA-0134</b> | OLA               | Solithane 113                                | Epoxy - urethane pre-polymer                   | 1/2 of 3" pan      |
| <b>OR-MA-0135</b> | OLA               | Solithane 113                                | Epoxy - urethane pre-polymer                   | 1/2 of 3" pan      |
| <b>OR-MA-0136</b> | OLA               | Solithane 113                                | Epoxy - urethane pre-polymer                   | 1/2 of 3" pan      |
| <b>OR-MA-0137</b> | OLA               | Solithane 113                                | Epoxy - urethane pre-polymer                   | 1/2 of 3" pan      |
| <b>OR-MA-0138</b> | OLA               | Solithane 113                                | Epoxy - urethane pre-polymer                   | 1/2 of 3" pan      |
| <b>OR-MA-0139</b> | OLA               | Solithane 113                                | Epoxy - urethane pre-polymer                   | 1/2 of 3" pan      |
| <b>OR-MA-0140</b> | OLA               | Solithane 113                                | Epoxy - urethane pre-polymer                   | 1/2 of 3" pan      |
| <b>OR-MA-0141</b> | OLA               | Hysol EA 934NA                               | Epoxy adhesive                                 | 1/2 of 3" pan      |
| <b>OR-MA-0142</b> | TAGSAM            | TAGSAM shim                                  | Aluminum foil                                  | 3 cm dia           |
| <b>OR-MA-0143</b> | SRC               | SRC sapphire witness plate coupon, post-open | Sapphire                                       | 1.2" x 0.8"        |
| <b>OR-MA-0144</b> | SRC               | SRC aluminum witness plate coupon, always    | Aluminum                                       | 1.2" x 0.8"        |

|                   |                   |                                                                  |                                                                     |                       |
|-------------------|-------------------|------------------------------------------------------------------|---------------------------------------------------------------------|-----------------------|
| <b>OR-MA-0145</b> | SRC               | SRC sapphire witness plate coupon, always                        | Sapphire                                                            | 1.2" x 0.8"           |
| <b>OR-MA-0146</b> | SRC               | SRC screw coupon                                                 | Stainless Steel; CRES                                               | 0.053" long           |
| <b>OR-MA-0147</b> | SRC               | SRC Cam coupon                                                   | Aluminum; 7050-T7451                                                | 10 cm <sup>2</sup>    |
| <b>OR-MA-0148</b> | SRC               | Flap coupon, SRC deployable witness plate assembly               | Aluminum                                                            | 10 cm <sup>2</sup>    |
| <b>OR-MA-0149</b> | OVIRS             | Braycote 601 EF lubricant                                        | Lubricant; Braycote 601 EF                                          | > 10 g                |
| <b>OR-MA-0150</b> | OVIRS             | Z93C55 conductive white paint                                    | Paint; Z93C55 conductive white silicate paint                       | two 2" x 2" surfaces  |
| <b>OR-MA-0151</b> | OVIRS             | EPOTEK 353 solar mesh epoxy                                      | Epoxy; EPOTEK 353                                                   | 1/4" x 3 inch syringe |
| <b>OR-MA-0152</b> | OVIRS             | EPOTEK 353ND epoxy - cured 1/4" x 3" syringe                     | Epoxy; EPOTEK 353ND epoxy - cured                                   | >10 g                 |
| <b>OR-MA-0153</b> | REXIS             | Braycote 601EF lubricant                                         | Lubricant; Braycote 601EF                                           | ~ 3 g                 |
| <b>OR-MA-0154</b> | REXIS             | Hysol EA 934 NA                                                  | Epoxy - Hysol 934 on REXIS Main Electronics Board                   | ~ 1.5 cm plug         |
| <b>OR-MA-0155</b> | Support Materials | LF8900C ziplock bag                                              | Polyethylene with fire retardant additives - Sb2O3 and ethane       | 16" x 16"             |
| <b>OR-MA-0156</b> | Support Materials | TAGSAM simulant                                                  | Tagish Lake simulant from A. Hildebrand                             | 10 g                  |
| <b>OR-MA-0157</b> | TAGSAM            | washer, Sampler Head U-joint Subassembly                         | Stainless Steel; CRES<br>NAS620C10L                                 | 0.354" od             |
| <b>OR-MA-0158</b> | Spacecraft        | Solar Cell Coupon, Solar Array                                   | Smart ZTJ material                                                  | 3" diameter           |
| <b>OR-MA-0159</b> | Spacecraft        | Hydrazine Dry Down #1                                            | NVR; hydrazine dry down                                             |                       |
| <b>OR-MA-0160</b> | Spacecraft        | Hydrazine Dry Down #2                                            | NVR; hydrazine drydown #2                                           |                       |
| <b>OR-MA-0161</b> | Spacecraft        | Hydrazine Dry Down #3                                            | NVR; Hydrazine Dry Down #3                                          |                       |
| <b>OR-MA-0162</b> | Spacecraft        | Hydrazine Dry Down #4                                            | NVR; Hydrazine Dry Down #4                                          |                       |
| <b>OR-MA-0163</b> | Spacecraft        | Hydrazine Dry Down blank                                         | NVR; Hydrazine Dry Down blank                                       |                       |
| <b>OR-MA-0164</b> | Spacecraft        | Hydrazine Dry Down blank                                         | NVR; Hydrazine Dry Down blank                                       |                       |
| <b>OR-MA-0165</b> | Spacecraft        | Hydrazine Dry Down unused vial                                   | NVR; Hydrazine Dry Down unused teflon vial                          |                       |
| <b>OR-MA-0166</b> | OCAMS             | OCAMS CDA motor                                                  | motor for all 3 OCAMS imagers                                       | 3"x2"x1"              |
| <b>OR-MA-0167</b> | Support Materials | End cap nylon bag from Lufkin AC                                 | nylon                                                               | 8" x 8"               |
| <b>OR-MA-0168</b> | SRC               | Manniglas MLI SRC                                                | MLI blanket                                                         | 6" x 6" + braid       |
| <b>OR-MA-0169</b> | TAGSAM            | Reinforced black Kapton blanket                                  | kapton, adhesive, kapton tape                                       | 8" x 8"               |
| <b>OR-MA-0170</b> | TAGSAM            | Diffuse PTFE film                                                | PTFE film, diffuse                                                  | 8" x 8"               |
| <b>OR-MA-0171</b> | SRC               | Avionics deck coupon                                             | Honeycomb, aluminum + facesheet                                     | ~ 5" long             |
| <b>OR-MA-0172</b> | SRC               | Batt Blanket Coupon                                              | Kapton, braid, solder                                               | 6" x 6"               |
| <b>OR-MA-0173</b> | OLA               | Black aluminum foil                                              | Aluminum foil, flat black epoxy                                     | ~ 1 ft2               |
| <b>OR-MA-0174</b> | SRC               | thermocouple coupon, SARA installation                           | copper-constantin wire; PFA insulation                              | ~12" long             |
| <b>OR-MA-0175</b> | Spacecraft        | RTV adhesive - solar arrays LM-BF10898A-0100                     | Epoxy - adhesive, silicone RTV                                      | 1.5" Al pan           |
| <b>OR-MA-0176</b> | Support Materials | Braycote TAGSAM gas delivery system                              | Lubricant; braycote 601EF                                           | ~ 1 g                 |
| <b>OR-MA-0177</b> | TAGSAM            | Flight head build sponge count                                   | miscellaneous                                                       | ~ 20" bag             |
| <b>OR-MA-0178</b> | Support Materials | gloves from TAGSAM flight head installation (see note)           | nitrile gloves                                                      | ~ 20 " bag            |
| <b>OR-MA-0179</b> | Support Materials | swabs from baffle/optical cleaning                               | cotton swabs                                                        | ~12" bag              |
| <b>OR-MA-0180</b> | Support Materials | Braycote 601 EF; s/c transport SVIP purge system                 | Lubricant; braycote 601 EF                                          | 2 oz tube (empty)     |
| <b>OR-MA-0181</b> | SRC               | avionics box pressure transducer, insulation; 8530C-15M41-SRC-BK | miscellaneous; avionics box pressure transducer, trimmed insulation | 12" long pieces       |
| <b>OR-MA-0182</b> | Support Materials | Contamination event, soldering tool                              | glass-filled nylon; soldering tool                                  | ~ 6" long             |

|                   |                   |                                                                         |                                            |                    |
|-------------------|-------------------|-------------------------------------------------------------------------|--------------------------------------------|--------------------|
| <b>OR-MA-0183</b> | SRC               | molybdenum disulfide, MMSN399A100                                       | Lubricant; braycote 602EF                  | ~ 1 g              |
| <b>OR-MA-0184</b> | Support Materials | epoxy for fairing doors                                                 | Epoxy - CHO-BOND 1030-55                   | 1.5 x 1.5 x 1 cm   |
| <b>OR-MA-0185</b> | Support Materials | Entegris filter                                                         | filter for purge gass on MLP/VIF           | ~ 8" x 3" cylinder |
| <b>OR-MA-0186</b> | TAGSAM            | convoluted tube - T section                                             | stainless steel                            | ~ 12"              |
| <b>OR-MA-0187</b> | TAGSAM            | convoluted tube - inlet side                                            | stainless steel                            | ~ 16" length       |
| <b>OR-MA-0188</b> | Support Materials | fluoroclean dry down #1                                                 | NVR; fluoroclean HE-27152-AEBT             | A1 pan 2"          |
| <b>OR-MA-0189</b> | Support Materials | payload fairing amino acid foil witness plates                          | Aluminum foil; amino acid witness plates   | 12" x 12"          |
| <b>OR-MA-0190</b> | Support Materials | payload fairing particle plates filter paper - left                     | filter paper                               | ~2" circles        |
| <b>OR-MA-0191</b> | Support Materials | payload fairing particle plates filter paper - right                    | filter paper                               | 2" paper disc      |
| <b>OR-MA-0192</b> | Support Materials | fluoroclean dry down #2                                                 | NVR; fluoroclean HE-27152-AEBT             | A1 pan 2"          |
| <b>OR-MA-0193</b> | SRC               | Epoxy used on sep/spin mechanism repair LM-AE10782A                     | Epoxy - Scotch Weld EC-2216                | ~ 1 g              |
| <b>OR-MA-0194</b> | SRC               | Epoxy used on SRC avionics deck - connector bracket re-work LM-AE10782A | Epoxy - Scotch Weld EC-2216                | ~ 1 g              |
| <b>OR-MA-0195</b> | SRC               | Epoxy used on avionics deck LM-AE10490A                                 | Epoxy - Henkel Loctite EA9394              | ~ 1 g              |
| <b>OR-MA-0196</b> | SRC               | Epoxy used on avionics deck LM-AE10490A                                 | Epoxy - Henkel Loctite EA9394              | ~ 1 g              |
| <b>OR-MA-0197</b> | SRC               | Epoxy used on avionics deck LM-AE10490A                                 | Epoxy - Henkel Loctite EA9394              | ~ 1 g              |
| <b>OR-MA-0198</b> | SRC               | Epoxy used on avionics deck LM-AE10490A                                 | Epoxy - Henkel Loctite EA9394              | ~ 1 g              |
| <b>OR-MA-0199</b> | SRC               | Epoxy used on avionics deck LM-AE10490A                                 | Epoxy - Henkel Loctite EA9394              | ~ 1 g              |
| <b>OR-MA-0200</b> | SRC               | Epoxy used on avionics deck LM-AE10490A                                 | Epoxy - Henkel Loctite EA9394              | ~ 1 g              |
| <b>OR-MA-0201</b> | SRC               | Epoxy used on avionics deck LM-AE10490A                                 | Epoxy - Henkel Loctite EA9394              | ~ 1 g              |
| <b>OR-MA-0202</b> | SRC               | Epoxy used on avionics deck LM-AE10490A                                 | Epoxy - Henkel Loctite EA9394              | ~ 1 g              |
| <b>OR-MA-0203</b> | SRC               | SRC pushoff fitting re-work; LM-BF10316B                                | Epoxy; RTV 566 silicone adhesive Momentive | ~ 1 g              |
| <b>OR-MA-0204</b> | SRC               | SRC R&R assembly; LM-BF10316B                                           | Epoxy; RTV 566 silicone adhesive Momentive | ~ 1 g              |
| <b>OR-MA-0205</b> | SRC               | SRC backshell pushoff removed, replaced with 203; LM-BF10316B           | Epoxy; RTV 566 silicone adhesive Momentive | ~ 1 g              |
| <b>OR-MA-0206</b> | SRC               | SRC harness install; LM-BF10316B                                        | Epoxy; RTV 566 silicone adhesive Momentive | ~ 1 g              |
| <b>OR-MA-0207</b> | SRC               | SRC backshell parachute seal; LM-BF10316B                               | Epoxy; RTV 566 silicone adhesive Momentive | ~ 1 g              |
| <b>OR-MA-0208</b> | SRC               | SRC Catch Can install; LM-BF10316B                                      | Epoxy; RTV 566 silicone adhesive Momentive | ~ 1 g              |
| <b>OR-MA-0209</b> | SRC               | SRC backshell inner seal; LM-BF10316B                                   | Epoxy; RTV 566 silicone adhesive Momentive | ~ 1 g              |
| <b>OR-MA-0210</b> | SRC               | SRC backshell outer seal; LM-BF10316B                                   | Epoxy; RTV 566 silicone adhesive Momentive | ~ 1 g              |
| <b>OR-MA-0211</b> | SRC               | SRC backshell vents; LM-BF10316B                                        | Epoxy; RTV 566 silicone adhesive Momentive | ~ 1 g              |
| <b>OR-MA-0212</b> | SRC               | SRC sep/spin thermal test cable; LM-BF10316B                            | Epoxy; RTV 566 silicone adhesive Momentive | ~ 1 g              |
| <b>OR-MA-0213</b> | SRC               | SRC harness potting; LM-BF10316B                                        | Epoxy; RTV 566 silicone adhesive Momentive | ~ 1 g              |
| <b>OR-MA-0214</b> | SRC               | SRC backshell fitting installation; LM-BF10316B                         | Epoxy; RTV 566 silicone adhesive Momentive | ~ 1 g              |
| <b>OR-MA-0215</b> | SRC               | SRC backshell seal emulsion; LM-BF10316B                                | Epoxy; RTV 566 silicone adhesive Momentive | ~ 1 g              |
| <b>OR-MA-0216</b> | SRC               | SRC test seal, providing just in case; LM-BF10316B                      | Epoxy; RTV 566 silicone adhesive Momentive | ~ 1 g              |
| <b>OR-MA-0217</b> | SRC               | SARA cable fitting to test cable; LM-BF10316B                           | Epoxy; RTV 566 silicone adhesive Momentive | ~ 1 g              |
| <b>OR-MA-0218</b> | SRC               | epoxy used on SRC filter assembly LM-AE10490A                           | Epoxy; Henkel Loctite EA9394               | ~ 1 g              |
| <b>OR-MA-0219</b> | SRC               | epoxy used on SRC filter assembly LM-AE10490A                           | Epoxy; Henkel Loctite EA9394               | ~ 1 g              |



|                   |            |                                                                                         |                                                     |                          |
|-------------------|------------|-----------------------------------------------------------------------------------------|-----------------------------------------------------|--------------------------|
| <b>OR-MA-0220</b> | SRC        | epoxy used on SRC backshell pin plate                                                   | Epoxy; Henkel Loctite EA9394                        | ~ 1 g                    |
| <b>OR-MA-0221</b> | SRC        | epoxy used on SRC filter assembly LM-AE10490A                                           | Epoxy; Henkel Loctite EA9394                        | ~ 1 g                    |
| <b>OR-MA-0222</b> | SRC        | epoxy used on SRC septum bushing LM-AE10490A                                            | Epoxy; Henkel Loctite EA9394                        | ~ 1 g                    |
| <b>OR-MA-0223</b> | TAGSAM     | epoxy used on TAGSAM N2 system temp sensors LM-AE10490A                                 | Epoxy; Henkel Loctite EA9394                        | ~ 1 g                    |
| <b>OR-MA-0224</b> | SRC        | epoxy used on SRC hinge assbly - spools, shunt insert LM-AE10490A                       | Epoxy; Henkel Loctite EA9394                        | ~ 1 g                    |
| <b>OR-MA-0225</b> | SRC        | epoxy used on SRC filter assembly LM-AE10490A                                           | Epoxy; Henkel Loctite EA9394                        | ~ 1 g                    |
| <b>OR-MA-0226</b> | SRC        | epoxy used on SRC stepper motor assbly - heater wire bonding LM-AE10490A                | Epoxy; Henkel Loctite EA9394                        | ~ 1 g                    |
| <b>OR-MA-0227</b> | SRC        | epoxy used on SRC filter assembly LM-AE10490A                                           | Epoxy; Henkel Loctite EA9394                        | ~ 1 g                    |
| <b>OR-MA-0228</b> | SRC        | epoxy used on SRC avionics deck assembly - nut plate install LM-AE10490A                | Epoxy; Henkel Loctite EA9394                        | ~ 1 g                    |
| <b>OR-MA-0229</b> | SRC        | epoxy used on SRC bathtub fitting (attaches backshell to deck) LM-AE10490A              | Epoxy; Henkel Loctite EA9394                        | ~ 1 g                    |
| <b>OR-MA-0230</b> | SRC        | epoxy used on avionics deck inserts LM-AE10490A                                         | Epoxy; Henkel Loctite EA9394                        | ~ 1 g                    |
| <b>OR-MA-0231</b> | SRC        | epoxy used on Detent insert installation LM-AE10490A                                    | Epoxy; Henkel Loctite EA9394                        | ~ 1 g                    |
| <b>OR-MA-0232</b> | SRC        | epoxy used on avionics deck various locations LM-AE10490A                               | Epoxy; Henkel Loctite EA9394                        | ~ 1 g                    |
| <b>OR-MA-0233</b> | SRC        | SRC filter unit                                                                         | Aluminum, filter, epoxy                             | ~9.5 round x 2.5 cm high |
| <b>OR-MA-0234</b> | SRC        | epoxy used on sample canister hinge assby - new insert installation LM-AE10490A         | Epoxy; Henkel Loctite EA9394                        | ~ 1 g                    |
| <b>OR-MA-0235</b> | SRC        | epoxy used on sample canister hinge assby - new insert installation LM-AE10490A         | Epoxy; Henkel Loctite EA 9394                       | ~ 1 g                    |
| <b>OR-MA-0236</b> | SRC        | epoxy used on SRC filter assembly LM-AE10490A                                           | Epoxy; Henkel Loctite EA9394                        | ~ 1 g                    |
| <b>OR-MA-0237</b> | TAGSAM     | epoxy used on TAGSAM N2 gas assembly LM-AE10490A                                        | Epoxy; Henkel Loctite EA9394                        | ~ 1 g                    |
| <b>OR-MA-0238</b> | SRC        | epoxy used on SRC lap shear testing LM-AE10490A                                         | Epoxy; Henkel Loctite EA9394                        | ~ 1 g                    |
| <b>OR-MA-0239</b> | SRC        | epoxy used in an unknown location                                                       | Epoxy; Henkel Loctite EA9394                        | ~ 1 g                    |
| <b>OR-MA-0240</b> | SRC        | Nusil 2599 LM-AH10314A SRC temp sensor replacement                                      | Epoxy; Nusil 2599 silicone adhesive                 | ~ 1 g                    |
| <b>OR-MA-0241</b> | SRC        | Nusil 2599 LM-AH10314A SRC temp sensor replacement                                      | Epoxy; Nusil 2599 silicone adhesive                 | ~ 1 g                    |
| <b>OR-MA-0242</b> | SRC        | Nusil 2599 LM-AH10314A sep/spin installation - temp sensor                              | Epoxy; Nusil 2599 silicone adhesive                 | ~ 1 g                    |
| <b>OR-MA-0243</b> | TAGSAM     | Nusil 2599 LM-AH10314A TAGSAM wrist motor thermal assmy                                 | Epoxy; Nusil 2599 silicone adhesive                 | ~ 1 g                    |
| <b>OR-MA-0244</b> | TAGSAM     | Nusil 2599 LM-AH10314A TAGSAM shoulder drive thermal control - temp sensor installation | Epoxy; Nusil 2599 silicone adhesive                 | ~ 1 g                    |
| <b>OR-MA-0245</b> | SRC        | Nusil 2599 LM-AH10314A SRC stepper motor sensor bonding                                 | Epoxy; Nusil 2599 silicone adhesive                 | ~ 1 g                    |
| <b>OR-MA-0246</b> | TAGSAM     | Nusil 2599 LM-AH10314A TAGSAM shoulder drive thermal control - temp sensor install      | Epoxy; Nusil 2599 silicone adhesive                 | ~ 1 g                    |
| <b>OR-MA-0247</b> | TAGSAM     | Nusil 2599 LM-AH10314A TAGSAM wrist motor temp sensor install                           | Epoxy; Nusil 2599 silicone adhesive                 | ~ 1 g                    |
| <b>OR-MA-0248</b> | SRC        | Nusil 2599 LM-AH10314A SRC avionics and battery temp sensor install                     | Epoxy; Nusil 2599 silicone adhesive                 | ~ 1 g                    |
| <b>OR-MA-0249</b> | SRC        | Nusil 2599 LM-AH10314A sep/spin installation - sep nut thermal install                  | Epoxy; Nusil 2599 silicone adhesive                 | ~ 1 g                    |
| <b>OR-MA-0250</b> | Spacecraft | Nusil 2599 LM-AH10314A NavCams temp sensor installation                                 | Epoxy; Nusil 2599 silicone adhesive                 | ~ 1 g                    |
| <b>OR-MA-0251</b> | TAGSAM     | contact pad coupon                                                                      | stainless steel velcro; aluminum                    | ~ 5/8" dia.              |
| <b>OR-MA-0252</b> | TAGSAM     | wire mesh screen coupon                                                                 | stainless steel                                     | 3 cm                     |
| <b>OR-MA-0253</b> | SRC        | NAS1352N08-6; SRC top assembly witness plate screws                                     | Stainless Steel; heat resistant steel; NAS1352N08-6 | ~ 0.375"                 |
| <b>OR-MA-0254</b> | SRC        | razor blade, detent pin cleaning                                                        | steel                                               | ~ 1.5"                   |

|            |                   |                                                                                         |                                                        |                      |
|------------|-------------------|-----------------------------------------------------------------------------------------|--------------------------------------------------------|----------------------|
| OR-MA-0255 | SRC               | retainer clip, fixed coupon top assembly witness plate                                  | Stainless steel - CRES                                 | ~ 10 cm <sup>2</sup> |
| OR-MA-0256 | TAGSAM            | Braycote 602 EF + Mo disulfide; sine vibe test preparations                             | Lubricant; Braycote 602 EF (Castrol) + MoS2 (Dow)      | ~ 1 g                |
| OR-MA-0257 | Support Materials | witness plate stand frame                                                               | Aluminum 6061-T6                                       | ~ 12" long           |
| OR-MA-0258 | SRC               | red primer, PR-1200RTV; LM-CJ-10894A-0013                                               | Silane; used for SRC battery and avionics temp sensors | ~ 1 g                |
| OR-MA-0259 | TAGSAM            | gloves used by Jim Harris for witness plate fit check                                   | nitrile, butadene rubber; NxT                          | 1 large size glove   |
| OR-MA-0260 | TAGSAM            | screw coupon, sampler head subassembly                                                  | Stainless steel - CRES; NAS1152E7                      | ~ 1.5 cm long        |
| OR-MA-0261 | TAGSAM            | Spring coupon, sampler head subassembly                                                 | stainless steel                                        | 0.5" diam.           |
| OR-MA-0262 | SRC               | SRC dust cover caplugs                                                                  | Polyethylene polymer conductive                        | ~ 1" diam.           |
| OR-MA-0263 | Support Materials | nitrile glove used in SSL                                                               | nitrile glove blue                                     | 1 glove (M)          |
| OR-MA-0264 | TAGSAM            | Washer coupon, sampler head subassembly                                                 | Stainless steel - CRES; NAS620C8L                      | 5/16" diam.          |
| OR-MA-0265 | TAGSAM            | washer coupon, sampler head subassembly                                                 | Stainless steel - CRES; NAS620C8                       | 0.304" diam.         |
| OR-MA-0266 | TAGSAM            | Sampler Head diaphragm coupon                                                           | Mylar                                                  | 10 cm <sup>2</sup>   |
| OR-MA-0267 | TAGSAM            | cap screw coupon, sampler head subassembly                                              | Stainless steel - CRES; NAS1352N08-10                  | ~ 0.75" diam.        |
| OR-MA-0268 | TAGSAM            | screw coupon, sampler head subassembly                                                  | Stainless steel - CRES; NAS1102E08-10                  | 1.5 cm long          |
| OR-MA-0269 | TAGSAM            | Washer coupon, TAGSAM, W3-50-TI                                                         | Titanium 6AL-4VTI                                      | 0.5" dia.            |
| OR-MA-0270 | TAGSAM            | screw coupon, sampler head subassembly NAS1152E8                                        | Stainless steel - CRES; NAS1152E8                      | 2 cm long            |
| OR-MA-0271 | TAGSAM            | nut coupon, sampler head subassembly                                                    | steel; silver plated; hexagonal nut                    | 0.75 cm od           |
| OR-MA-0272 | TAGSAM            | restraint coupon, sampler head sub-assembly                                             | Titanium                                               | 6 cm long            |
| OR-MA-0273 | SRC               | Al witness plate, pre-open coupon                                                       | Aluminum                                               | 1" x 0.75"           |
| OR-MA-0274 | Support Materials | ESD wrist strap used by ATLO personnel                                                  | metallic, painted                                      | 0.75" long           |
| OR-MA-0275 | SRC               | washer coupon, SRC tang assembly                                                        | Stainless steel - CRES; NAS620C2                       | 0.149" od            |
| OR-MA-0276 | Support Materials | particle fallout plate PFOP unused                                                      | polystyrene; HVWP filter                               | 47 mm diam. filter   |
| OR-MA-0277 | TAGSAM            | washer coupon, U-joint sub-assembly                                                     | Stainless steel - CRES; NAS1149EN632R                  | 0.375" od            |
| OR-MA-0278 | Support Materials | connector used for wire splicing                                                        | glass filled nylon                                     | 1.25" long           |
| OR-MA-0279 | TAGSAM            | screw coupon, sampler head top assembly                                                 | Stainless Steel; heat resistant; NAS1351N08-12         | 2.25 cm long         |
| OR-MA-0280 | TAGSAM            | spring spacer coupon, witness plate assembly                                            | Aluminum alloy 6061-T651                               | ~ 0.86 g             |
| OR-MA-0281 | SRC               | Silicone adhesive hardness coupon; microchip installation                               | Epoxy - adhesive, silicone RTV-142                     | ~ 1 g                |
| OR-MA-0282 | SRC               | LH torsion spring coupon, capture ring assembly                                         | stainless steel                                        | ~ 2 " long           |
| OR-MA-0283 | SRC               | LH Spring coupon, SRC top assembly                                                      | stainless steel                                        | ~ 2" long            |
| OR-MA-0284 | SRC               | RH Spring coupon, SRC top assembly                                                      | stainless steel                                        | ~ 2" long            |
| OR-MA-0285 | TAGSAM            | detent pin coupon (-006) DUPLICATE; wrist drive assembly                                | Stainless steel; A386-CRES                             | ~ 2 cm long          |
| OR-MA-0286 | SRC               | Washer coupon DUPLICATE, SRC top assembly                                               | Stainless steel; 300 CRES - NAS620C8L                  | ~0.5 cm OD           |
| OR-MA-0287 | TAGSAM            | Washer coupon, DUPLICATE, TAGSAM, W3-50-TI                                              | Titanium 6AL-4VTI                                      | 0.5" dia.            |
| OR-MA-0288 | TAGSAM            | silicone adhesive LM-AH10314A; Qual shoulder drive assembly                             | Epoxy; Nusil silicone adhesive                         | ~ 1 g                |
| OR-MA-0289 | TAGSAM            | Nusil silicone adhesive; LM-AH10314A; SCV1-2599; qual N2 gas system temp sensor install | Epoxy; Silicone adhesive                               | ~ 1 g                |
| OR-MA-0290 | TAGSAM            | Nusil silicone adhesive; LM-AH10314A; SCV1-2599; qual wrist drive assembly - non-flight | Epoxy; Silicone adhesive                               | ~ 1 g                |



|                   |                   |                                                                                            |                                                                                                     |                                     |
|-------------------|-------------------|--------------------------------------------------------------------------------------------|-----------------------------------------------------------------------------------------------------|-------------------------------------|
| <b>OR-MA-0291</b> | TAGSAM            | Nusil silicone adhesive; LM-AH10314A; SCV1-2599; qual shoulder drive assembly - non-flight | Epoxy; Silicone adhesive                                                                            | ~ 1 g                               |
| <b>OR-MA-0292</b> | SRC               | backshell coupon                                                                           | SLA-561V                                                                                            | 3" x 3"                             |
| <b>OR-MA-0293</b> | Launch Container  | epoxy adhesive, sealant for amphenol connector                                             | Epoxy - UAH 6190                                                                                    | > 1 g                               |
| <b>OR-MA-0294</b> | Launch Container  | Blanket repair tape, payload fairing                                                       | extruded PTFE; silicone adhesive                                                                    | ~ 2" long                           |
| <b>OR-MA-0295</b> | Spacecraft        | ACS Thruster Assembly NFP30708100                                                          | Valves - Stainless steel 300 series, Thruster Chamber - Inconel, Catalyst - iridium coated aluminum | 8" x 1.75";<br>Flight mass:<br>0.36 |
| <b>OR-MA-0296</b> | SRC               | Tombstone coupon, SRC top assembly                                                         | Aluminum alloy 7050-T7451                                                                           | 10 cm <sup>2</sup>                  |
| <b>OR-MA-0297</b> | TAGSAM            | Sampler Head Mass Simulator (aluminum hat)                                                 | Aluminum, clear anodized                                                                            | 3.2 kg                              |
| <b>OR-MA-0298</b> | TAGSAM            | stepper motor, SRC and TAGSAM                                                              | heater, temperature sensor, motor                                                                   | flight mass<br>0.39 kg              |
| <b>OR-MA-0299</b> | SRC               | pica coupon                                                                                | PICA                                                                                                | unknown,<br>flight mass<br>9.94 kg  |
| <b>OR-MA-0300</b> | Support Materials | unknown foil put in Jamie's cabinet                                                        | unknown                                                                                             | 6" x 6"                             |
| <b>OR-MA-0301</b> | SRC               | washer coupon, capture ring assembly                                                       | stainless steel CRES; NAS620C6                                                                      | 0.267" o.d.                         |
| <b>OR-MA-0302</b> | TAGSAM            | baseplate coupon, sampler head subassembly                                                 | Aluminum 6061-T651                                                                                  | 10 cm <sup>2</sup>                  |
| <b>OR-MA-0303</b> | TAGSAM            | Convolute tube, feedline assembly                                                          | stainless steel                                                                                     | 1 tube                              |
| <b>OR-MA-0304</b> | SRC               | stow guide bracket sample assembly, left                                                   | Aluminum / Stainless steel                                                                          | 10 cm <sup>2</sup>                  |
| <b>OR-MA-0305</b> | TAGSAM            | sampler head air tube                                                                      | Aluminum alloy; 6061-T651                                                                           | ~ 2.25" long                        |
| <b>OR-MA-0306</b> | TAGSAM            | Sampler head surface plate coupon                                                          | Aluminum alloy; 6061-T7451                                                                          | 10 cm <sup>2</sup>                  |
| <b>OR-MA-0307</b> | TAGSAM            | Bolt restraint coupon, sampler head subassembly                                            | Aluminum alloy 6061-T651                                                                            | 10 cm <sup>2</sup>                  |
| <b>OR-MA-0308</b> | TAGSAM            | Fan support plate coupon, sampler head subassembly                                         | Aluminum alloy 6061-T651                                                                            | 10 cm <sup>2</sup>                  |
| <b>OR-MA-0309</b> | TAGSAM            | Standoff coupon, sampler head subassembly                                                  | Aluminum 6061-T651 and CRES MS21209C0815                                                            | 5.5 cm long                         |
| <b>OR-MA-0310</b> | TAGSAM            | Cover plate coupon, sampler head subassembly                                               | Aluminum alloy 6061-T651                                                                            | 10 cm <sup>2</sup>                  |
| <b>OR-MA-0311</b> | TAGSAM            | screw coupon, sampler head subassembly                                                     | stainless steel CRES NAS1102E08-6                                                                   | 1 cm long                           |
| <b>OR-MA-0312</b> | TAGSAM            | contact pad spool coupon                                                                   | stainless steel CRES 304L                                                                           | 0.75" o.d.                          |
| <b>OR-MA-0313</b> | TAGSAM            | screen coupon, air filter assembly                                                         | stainless steel CRES 304L                                                                           | 10 cm <sup>2</sup>                  |
| <b>OR-MA-0314</b> | TAGSAM            | sapphire witness plate coupon, post-stow                                                   | Sapphire                                                                                            | 1" diam.                            |
| <b>OR-MA-0315</b> | TAGSAM            | self-locking nut coupon, U-joint subassembly                                               | silver plated CRES                                                                                  | ~0.33" o.d.                         |
| <b>OR-MA-0316</b> | SRC               | witness plate bracket coupon                                                               | Aluminum alloy 7050-T7451                                                                           | 10 cm <sup>2</sup>                  |
| <b>OR-MA-0317</b> | TAGSAM            | torsion spring RH coupon, witness plate assembly                                           | stainless steel 17-7                                                                                | ~ 3 cm long                         |
| <b>OR-MA-0318</b> | SRC               | Connector bracket enable coupon, SRC top assembly                                          | Aluminum alloy 7050-T7451                                                                           | 10 cm <sup>2</sup>                  |
| <b>OR-MA-0319</b> | TAGSAM            | witness plate retaining pin coupon                                                         | stainless steel CRES A286                                                                           | ~0.1 g                              |
| <b>OR-MA-0320</b> | TAGSAM            | U-joint yoke, sampler head subassembly                                                     | Aluminum alloy 6061-T651                                                                            | 10 cm <sup>2</sup>                  |
| <b>OR-MA-0321</b> | SRC               | cap screw coupon, SRC top assembly                                                         | Stainless Steel; heat resistant steel, NAS1351N3-8                                                  | 1.75 cm long                        |
| <b>OR-MA-0322</b> | SRC               | septum bushing coupon                                                                      | Aluminum alloy 6061-T651                                                                            | 10 cm <sup>2</sup>                  |
| <b>OR-MA-0323</b> | TAGSAM            | perforated plate coupon, air filter assembly                                               | stainless steel CRES 304L                                                                           | ~ 1 in2                             |
| <b>OR-MA-0324</b> | TAGSAM            | witness plate baseplate                                                                    | Aluminum alloy 6061-T651                                                                            | 10 cm <sup>2</sup>                  |
| <b>OR-MA-0325</b> | TAGSAM            | screw coupon, sampler head top assembly                                                    | Stainless steel - CRES NAS1102E04-5                                                                 | ~0.75 cm                            |
| <b>OR-MA-0326</b> | TAGSAM            | shaft coupon, witness plate assembly                                                       | stainless steel CRES A286                                                                           | 4.01 g                              |
| <b>OR-MA-0327</b> | TAGSAM            | U-joint fan support fitting assembly coupon                                                | Aluminum alloy 6061-T651                                                                            | 10 cm <sup>2</sup>                  |

|                   |                   |                                                               |                                                               |                    |
|-------------------|-------------------|---------------------------------------------------------------|---------------------------------------------------------------|--------------------|
| <b>OR-MA-0328</b> | SRC               | septum retainer coupon, SRC top assembly                      | Stainless Steel; heat resistant steel, NAS1351N6-14           | 1" long            |
| <b>OR-MA-0329</b> | SRC               | Bolt coupon, SRC hinge assembly                               | stainless steel CRES                                          | #10 x 0.4375"      |
| <b>OR-MA-0330</b> | TAGSAM            | Airframe bearing, inner POGO assembly                         | steel                                                         | 0.0375" od         |
| <b>OR-MA-0331</b> | Support Materials | ESD packaging, non-flight consumable                          | Dunshield ESD, used in LC firing to catch the lid - ATLO test | ~ 3" x 3"          |
| <b>OR-MA-0332</b> | SRC               | screw coupon, SRC top assembly                                | stainless steel CRES                                          | ~0.5" long         |
| <b>OR-MA-0333</b> | SRC               | bolt coupon, SRC hinge assembly                               | n/a                                                           | 0.688" long        |
| <b>OR-MA-0334</b> | SRC               | latch fitting, avionics deck assembly                         | Aluminum alloy 7075-T7351                                     | 10 cm <sup>2</sup> |
| <b>OR-MA-0335</b> | TAGSAM            | witness coupon retainer coupon, U-joint subassembly           | Aluminum alloy 6061-T651                                      | 10 cm <sup>2</sup> |
| <b>OR-MA-0336</b> | TAGSAM            | screw coupon, U-joint subassembly                             | n/a                                                           | ~ 1" long          |
| <b>OR-MA-0337</b> | TAGSAM            | feedline Tee coupon, sampler head subassembly                 | stainless steel CRES 316L                                     | 1.5" long          |
| <b>OR-MA-0338</b> | TAGSAM            | feedline elbow, sampler head subassembly                      | stainless steel CRES 316L                                     | 1.25" long         |
| <b>OR-MA-0339</b> | Launch Container  | launch container cover coupon, cover assembly                 | Aluminum alloy 6061-T651                                      | 10 cm <sup>2</sup> |
| <b>OR-MA-0340</b> | TAGSAM            | contact pad velcro loop pad coupon                            | stainless steel velcro                                        | 0.75" od           |
| <b>OR-MA-0341</b> | TAGSAM            | wrist joint restraints, sampler head subassembly              | Titanium                                                      | ~ 2.5" long        |
| <b>OR-MA-0342</b> | TAGSAM            | U-joint arm fitting, sampler head subassembly                 | Aluminum alloy 6061-T651                                      | 10 cm <sup>2</sup> |
| <b>OR-MA-0343</b> | TAGSAM            | bolt head capture cleat coupon, sampler head subassembly      | Aluminum alloy 6061-T651                                      | 10 cm <sup>2</sup> |
| <b>OR-MA-0344</b> | TAGSAM            | witness plate shaft coupon, witness plate assembly            | stainless steel CRES A286                                     | 4.01 g             |
| <b>OR-MA-0345</b> | SRC               | cotter pin coupon, capture ring assembly                      | stainless steel CRES; MS24665-151                             | 0.5" long          |
| <b>OR-MA-0346</b> | TAGSAM            | torsion spring LH coupon, sampler head witness plate assembly | stainless steel CRES                                          | ~1.25" long        |
| <b>OR-MA-0347</b> | TAGSAM            | witness plate post-stow coupon, witness plate assembly        | Aluminum 99.999%                                              | ~1: diam.          |
| <b>OR-MA-0348</b> | TAGSAM            | U-joint arm fitting coupon, U-joint subassembly               | stainless steel CRES A286<br>Cadmium plated<br>MS51830CAL102L | 0.134" diam.       |
| <b>OR-MA-0349</b> | SRC               | washer coupon, SRC top assembly                               | stainless steel CRES;<br>NAS1149CN832R                        | 0.875" od          |
| <b>OR-MA-0350</b> | TAGSAM            | screw coupon, sample head U-joint subassembly                 | stainless steel CRES; NAS1151E6                               | 0.375" od          |
| <b>OR-MA-0351</b> | TAGSAM            | nut coupon, sampler head U-joint subassembly                  | stainless steel CRES A286;<br>MS21043-06N                     | 0/168" od          |
| <b>OR-MA-0352</b> | TAGSAM            | feedline tube coupon, sampler head subassembly                | stainless steel CRES 316L                                     | ~0.122 kg          |
| <b>OR-MA-0353</b> | TAGSAM            | witness plate launch coupon, witness plate assembly           | Aluminum 99.999%                                              | ~ 1" diam.         |
| <b>OR-MA-0354</b> | TAGSAM            | witness plate cover plate coupon                              | Aluminum alloy 6061-T651                                      | 10 cm <sup>2</sup> |
| <b>OR-MA-0355</b> | SRC               | cap screw coupon, SRC top assembly                            | Stainless Steel; NAS1352E06-6                                 | 0.75" long         |
| <b>OR-MA-0356</b> | SRC               | washer coupon, capture ring assembly                          | stainless steel CRES;<br>NAS1149C0416R                        | 0.500" od          |
| <b>OR-MA-0357</b> | TAGSAM            | witness plate always coupon, witness plate assembly           | Aluminum 99.999%                                              | ~1" diam           |
| <b>OR-MA-0358</b> | SRC               | cap screw coupon, Tang assembly                               | stainless steel CRES                                          | ~0.25" long        |
| <b>OR-MA-0359</b> | TAGSAM            | U-joint fan support fitting, U-joint subassembly              | stainless steel CRES 303 cadmium plated MS51830CA104L         | 0.134" diam        |
| <b>OR-MA-0360</b> | TAGSAM            | sampler arm wrist shim, Pogo assembly                         | laminated aluminum                                            | 6 cm long          |
| <b>OR-MA-0361</b> | SRC               | washer coupon, sample cansiter top assembly                   | stainless steel CRES; NAS620C6L                               | 0.267" od          |
| <b>OR-MA-0362</b> | Launch Container  | launch container barrel coupon                                | Aluminum alloy 6061-T651                                      | 10 cm <sup>2</sup> |
| <b>OR-MA-0363</b> | TAGSAM            | cap screw coupon, TAGSAM top assembly                         | stainless steel CRES;<br>NAS1352N08H6                         | ~0.25" long        |
| <b>OR-MA-0364</b> | Spacecraft        | top deck blanket (+Z) spacecraft                              | kapton blanketing, kapton tape                                | 4" x 3"            |

|            |                   |                                                       |                                           |                  |
|------------|-------------------|-------------------------------------------------------|-------------------------------------------|------------------|
| OR-MA-0365 | Support Materials | nylon tape used to package TAGSAM TVAC NVR samples    | nylon tape, rubber adhesive               | 2" wide          |
| OR-MA-0366 | Support Materials | swabbed particulate from flight TAGSAM head           | unknown, collected with polyethylene swab | ~100-200 microns |
| OR-MA-0367 | Support Materials | pink polyethylene in cleanroom room 202               | Polyethylene, anti-static                 | maybe 2 ft2      |
| OR-MA-0368 | Spacecraft        | Spacecraft USB drive                                  | metallic                                  | ~ 1.5" long      |
| OR-MA-0369 | Support Materials | TAGCAMS nylon camera covers                           | nylon                                     | ~2" diam (2)     |
| OR-MA-0370 | Support Materials | Faraday Cap - cable cutter mate                       | n/a                                       | ~0.5" long       |
| OR-MA-0371 | Support Materials | Crane Control panel residue; Cape                     | unknown                                   | n/a              |
| OR-MA-0372 | TAGSAM            | severed frangibolt fasteners TAGSAM                   | stainless steel                           | ~2.25" long      |
| OR-MA-0373 | Support Materials | TAGSAM TVAC Si wafers                                 | Silicon wafers, polyethylene cases        | 3" diam (5)      |
| OR-MA-0374 | Spacecraft        | black kapton MLI blanketing                           | kapton, tapes, films, staples, etc.       | 8" x 8"          |
| OR-MA-0375 | Support Materials | tube cutter, qual TAGSAM head "decapitation"          | n/a                                       | ~1.5" long       |
| OR-MA-0376 | Support Materials | epoxy used to stake tube cutter                       | Epoxy, Glass                              | ~ 1 g            |
| OR-MA-0377 | SRC               | temperature sensor assembly coupon                    | wire, tape, thread, etc.                  | ~ 2 ft           |
| OR-MA-0378 | Support Materials | swabs from detent pin cleaning on SRC                 | Polyethylene swabs                        | ~2" swabs        |
| OR-MA-0379 | Launch Container  | PLA transducer cap - nylon                            | cap material unknown, nylon bagging       | ~0.5" long       |
| OR-MA-0380 | TAGSAM            | Qual TAGSAM head insert                               | ultem, stainless steel fastener           | ~3" long         |
| OR-MA-0381 | Support Materials | insert pull throughs, SRC canister                    | silicone                                  | ~2" long         |
| OR-MA-0382 | Support Materials | TAGSAM test blanket                                   | fiberglass re-inforced teflon             | ~ 2 ft long      |
| OR-MA-0383 | TAGSAM            | wire coupon, TAGSAM ordnance installation             | stainless steel CRES 302                  | 0.20" diam       |
| OR-MA-0384 | SRC               | Temperature strip coupon, SRC thermal installation    | kapton                                    | 0.56" diam       |
| OR-MA-0385 | SRC               | Temperature strip coupon, SRC thermal installation    | kapton                                    | 0.38" x 1.5"     |
| OR-MA-0386 | SRC               | Temperature strip coupon, SRC thermal installation    | kapton                                    | 0.38" x 0.8"     |
| OR-MA-0387 | Spacecraft        | Diode bonding adhesive coupon, solar array            | Epoxy - RTV silicone LM-BF10898F          | > 1 g            |
| OR-MA-0388 | Spacecraft        | Diode bonding adhesive coupon, solar array            | Epoxy - RTV silicone LM-BF10898B          | > 1 g            |
| OR-MA-0389 | Spacecraft        | wire coupon - red,blue - solar array                  | silver coated copper, kapton insulation   | > 1 ft           |
| OR-MA-0390 | Spacecraft        | wire coupon - green - solar array                     | silver coated copper, kapton insulation   | > 1 ft           |
| OR-MA-0391 | Support Materials | Ultratape 1153 clean tent tape coupon, VIF            | Polyethylene, rubber adhesive             | ~ 2"             |
| OR-MA-0392 | Support Materials | Ultratape 1154                                        | Polyethylene, synthetic rubber adhesive   | ~2"              |
| OR-MA-0393 | Support Materials | ULA fairing adhesive                                  | Epoxy - RTV silicone CV3-1142             | >1g              |
| OR-MA-0394 | SRC               | conformal coating coupon, sep/spin mechanism assembly | polyurethane (Arathane 5750)              | >1 g             |
| OR-MA-0395 | TAGSAM            | Qual TAGSAM head witness plates (3)                   | sapphire                                  | ~1" diam.        |
| OR-MA-0396 | TAGSAM            | Qual TAGSAM head witness plate                        | sapphire                                  | ~1" diam.        |
| OR-MA-0397 | TAGSAM            | Qual TAGSAM head witness plate + shim                 | sapphire                                  | ~1" diam.        |
| OR-MA-0398 | TAGSAM            | Qual TAGSAM head witness plate                        | sapphire                                  | ~1" diam.        |
| OR-MA-0399 | TAGSAM            | Qual TAGSAM head witness plate                        | sapphire                                  | ~1" diam.        |
| OR-MA-0400 | TAGSAM            | Qual TAGSAM head witness plates (3)                   | sapphire                                  | ~1" diam.        |
| OR-MA-0401 | Support Materials | Contamination Control samples Box 1 Al foils          | Aluminum foil                             | ~ 1 cm x 2 cm    |

|                   |                      |                                                             |               |               |
|-------------------|----------------------|-------------------------------------------------------------|---------------|---------------|
| <b>OR-MA-0402</b> | Support<br>Materials | Contamination Control samples Box 2 Al<br>foils             | Aluminum foil | ~ 1 cm x 2 cm |
| <b>OR-MA-0403</b> | Support<br>Materials | Contamination Control samples Box 3 Al<br>foils             | Aluminum foil | ~ 1 cm x 2 cm |
| <b>OR-MA-0404</b> | Support<br>Materials | Contamination Control samples Box 4 Al<br>foils             | Aluminum foil | ~ 1 cm x 2 cm |
| <b>OR-MA-0405</b> | Support<br>Materials | Contamination Control samples Box 5 Al<br>foils             | Aluminum foil | ~ 1 cm x 2 cm |
| <b>OR-MA-0406</b> | Support<br>Materials | Contamination control knowledge samples<br>curation cabinet | Aluminum foil | ~ 1 cm x 2 cm |
